# Supplementary material
Source: publisher figshare collection journal article supplement (https://acs.figshare.com/ndownloader/files/9885154)
Supplement: Supplementary file 1 [file 9885154]

## Supporting Information

### Liver-kidney-on-chip to study toxicity of drug metabolites

*Jannick Theobald<sup>1</sup>‡, Ali Ghanem<sup>1</sup>‡, Patrick Wallisch<sup>1</sup>, Amin A. Banaeiyan<sup>5</sup>, Miguel A. Andrade-Navarro<sup>6</sup>, Katarina Taškova<sup>6</sup>, Manuela Haltmeier<sup>7</sup>, Andreas Kurtz<sup>2</sup>, Holger Becker<sup>4</sup>, Stefanie Reuter<sup>3</sup>, Ralf Mrowka<sup>3</sup>, Xinlai Cheng<sup>1</sup>, Stefan Wölfl<sup>1</sup>\**

Seven supplementary figures are provided.

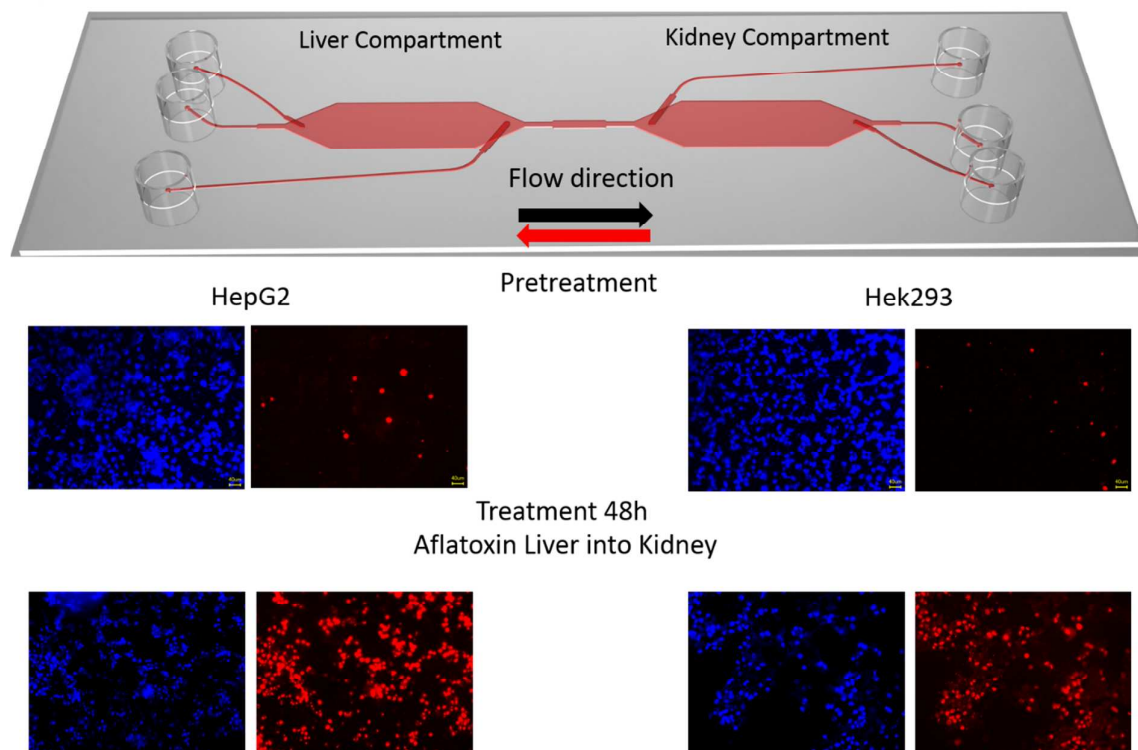

**Figure S1** Top: Illustrative example of flow direction and chamber assignment. Bottom: Illustrative example of viability staining of HepG2 and Hek293 cells with Hoechst (blue) PI (red). Cells were stained prior to treatment with 22,5  $\mu$ M AFB1 (top) and after 48 h treatment with AFB1 using microfluidic set up.

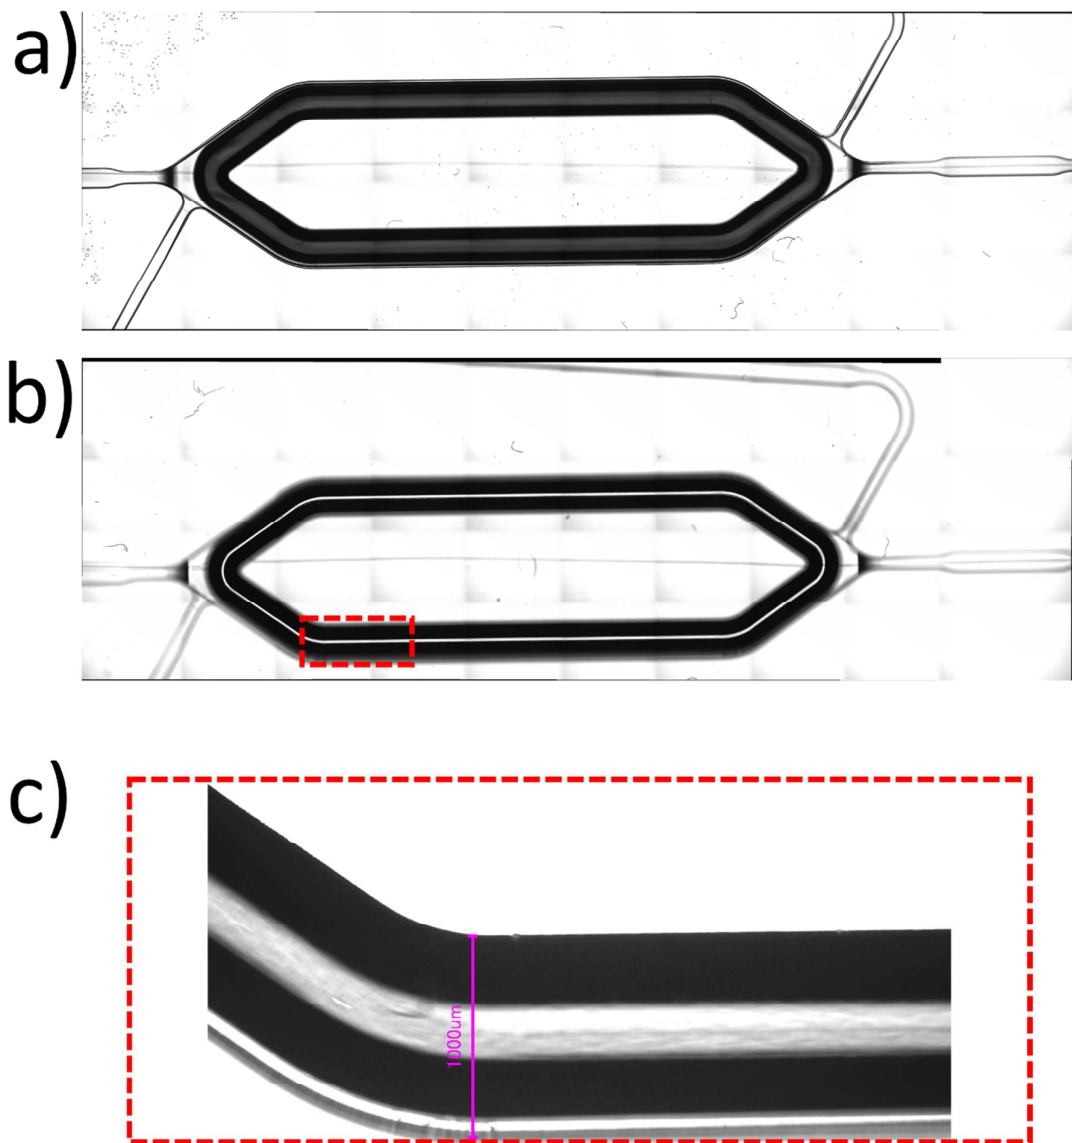

**Figure S2** Detailed view of  Chip design, a and b showing different focus levels of single chamber of the microfluidic design with the central cell culture area and the surrounding diffusion barrier /air bubble trap and media channel. Zoom in view on the diffusion barrier / air bubble trap is provided in c.

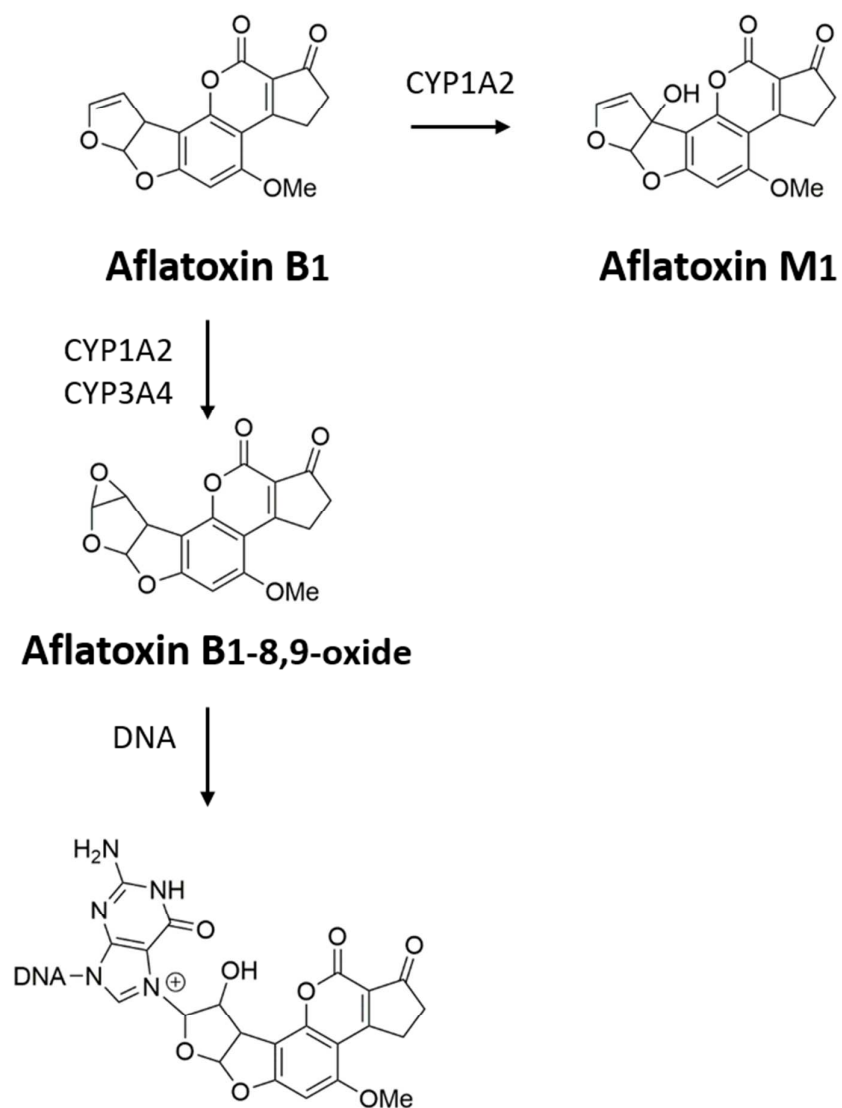

**Figure S3** Metabolism of Aflatoxin B1 via CYP1A1 and CYP3A4 to Aflatoxin B1-8,9 oxide which is adducting to Guanine forming DNA damage.

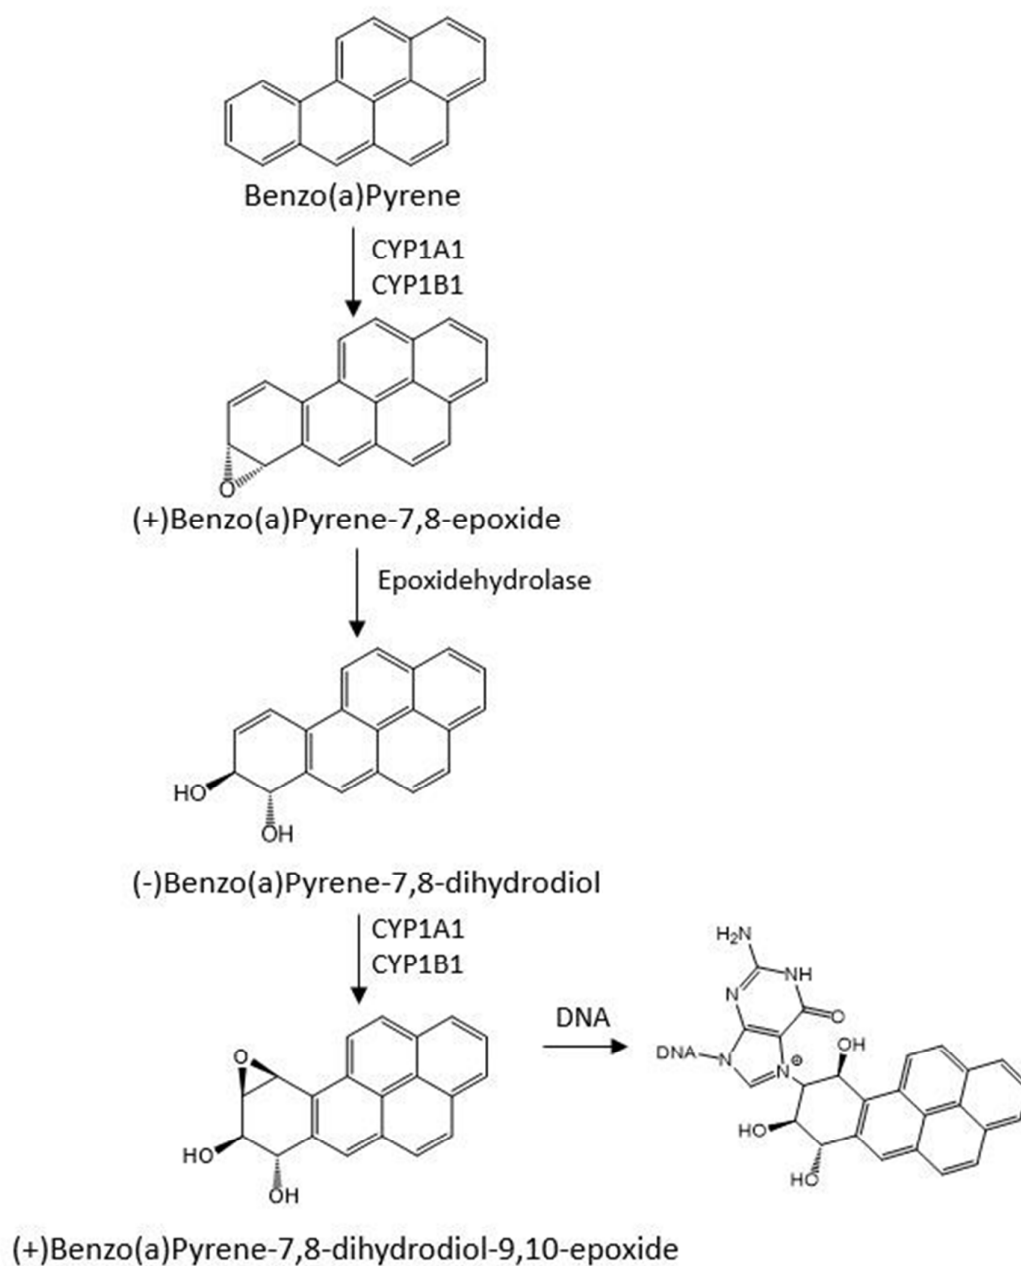

**Figure S4** Metabolism of BaP via CYP1A1 and CYP1B1 to Benzo(a)pyrene-7,8 dihydrodiol-9,10-epoxide forming DNA adduct causing DNA damage.

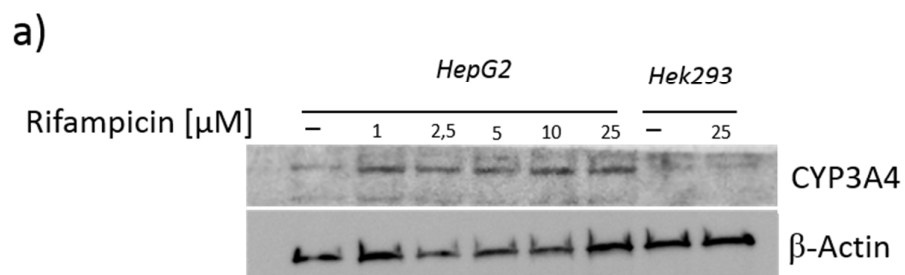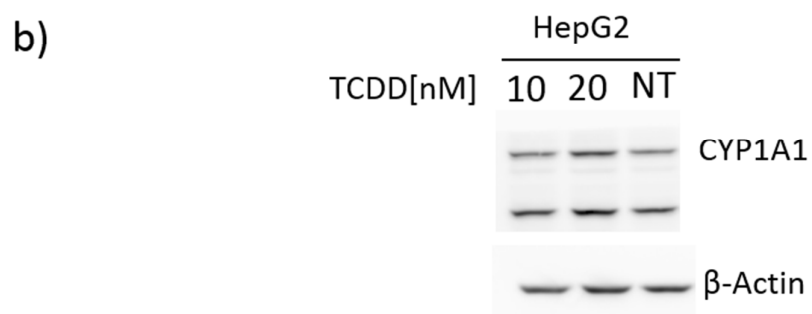

**Figure S5** Protein level analysis. a) HepG2 and Hek293 were treated with varying concentrations of Rifampicin for 24 hours. CYP3A4 enzyme level was analyzed,  $\beta$ -Actin was used as control. B) HepG2 cells treated with TCDD for 24 hours. CYP1A1 was analyzed,  $\beta$ -Actin was used as control.

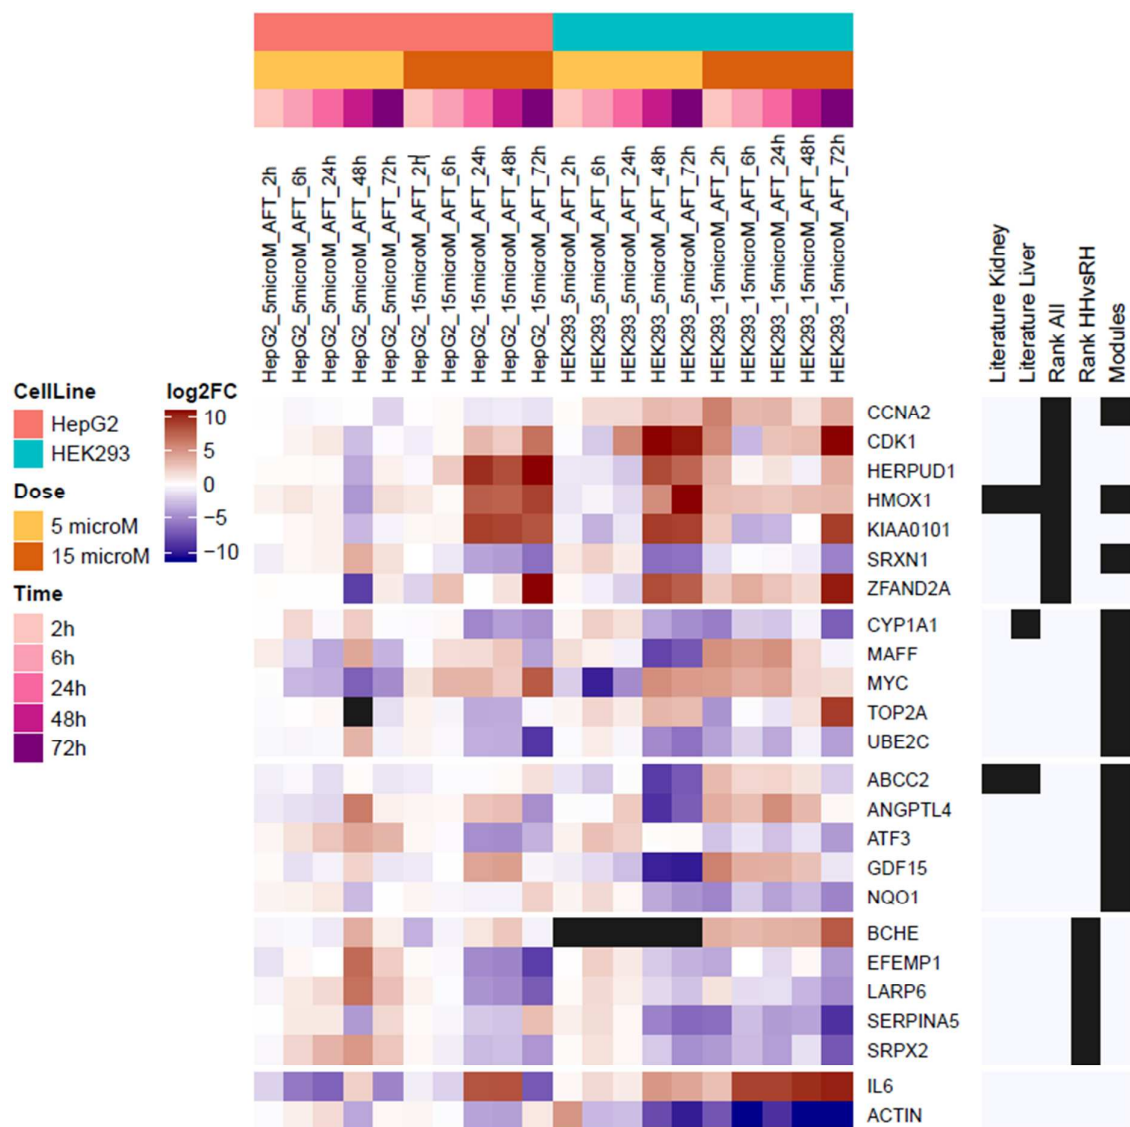

**Figure S6** Gene map of HepG2 and Hek293 cell treated with 5  $\mu$ M and 15  $\mu$ M AFB1 for varying time points. Data presented are normalized to the geometric mean of all samples.

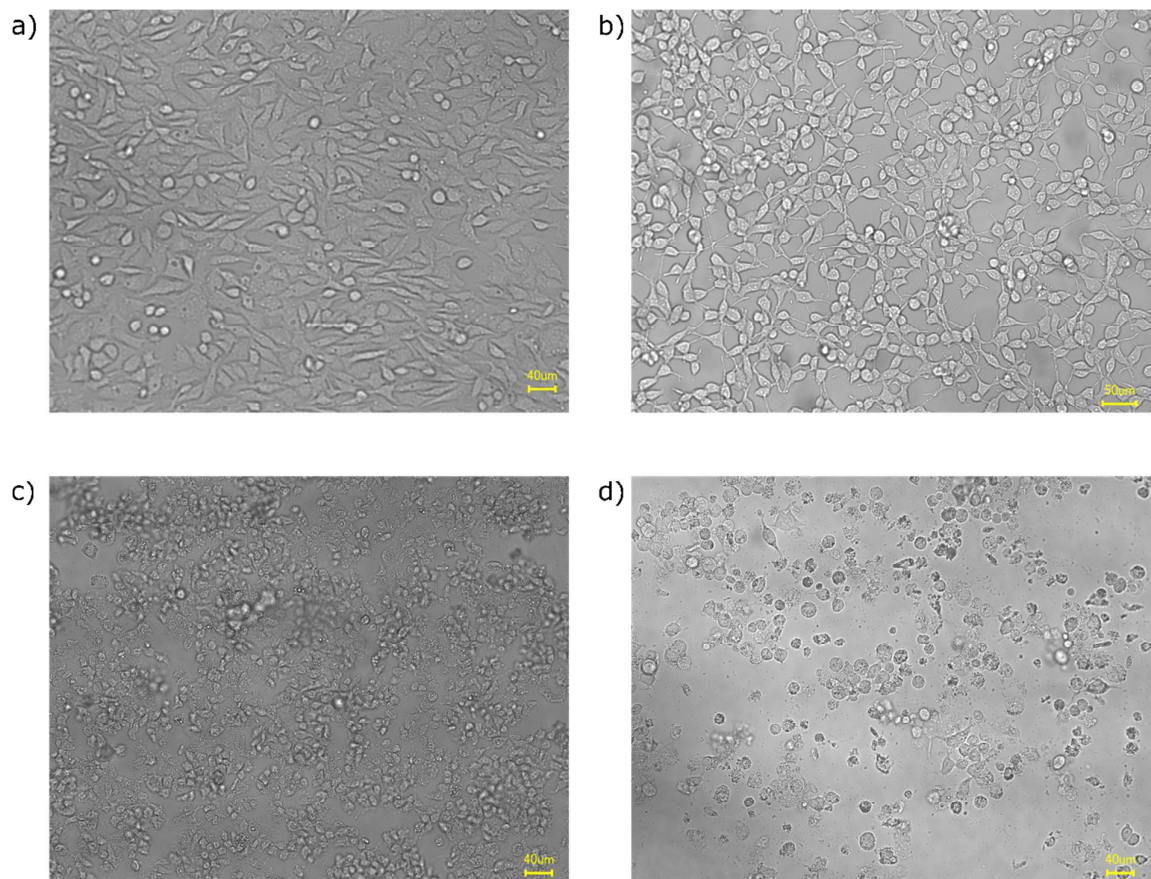

**Figure S7** Pictures of non-treated HepG2 WT cells (a) non treated Hek293 cells (b), HepG2 cells treated with 22,5  $\mu\text{M}$  AFB1 (c) and Hek293 cells treated with 22,5  $\mu\text{M}$  AFB1 (d) on chip. 20x magnification was used scale bar is 40  $\mu\text{M}$ .
